# Supplementary material for: Numerical simulation of Quantum Dots as a buffer layer in CIGS Solar Cells: A Comparative study
Source: Research Square preprint supplement (doi:10.21203/rs.3.rs-1506720/v1), 2022-04-13
Supplement: Supplementary file 1 [file b737de1a3f6e24c105a83d2b.docx]

**Numerical simulation of Quantum Dots as a buffer layer in CIGS Solar Cells: A Comparative study**

Asmaa Soheil Najm***a**, Araa Mebdir Holi **b** Asla Abdullah Al-Zahrani **c**

a Department of Electrical Electronic & Systems Engineering, Faculty of

Engineering and Built Environment, Universiti Kebangsaan Malaysia, 43600

UKM Bangi, Selangor, Malaysia

b Department of Physics, College of Education, University of Al-Qadisiyah, Al-

Diwaniyah, Al-Qadisiyah 58002, Iraq

c Imam Abdulrahman bin Faisal University, Eastern Region, Dammam, Kingdom

of Saudi

**Supplementary data**


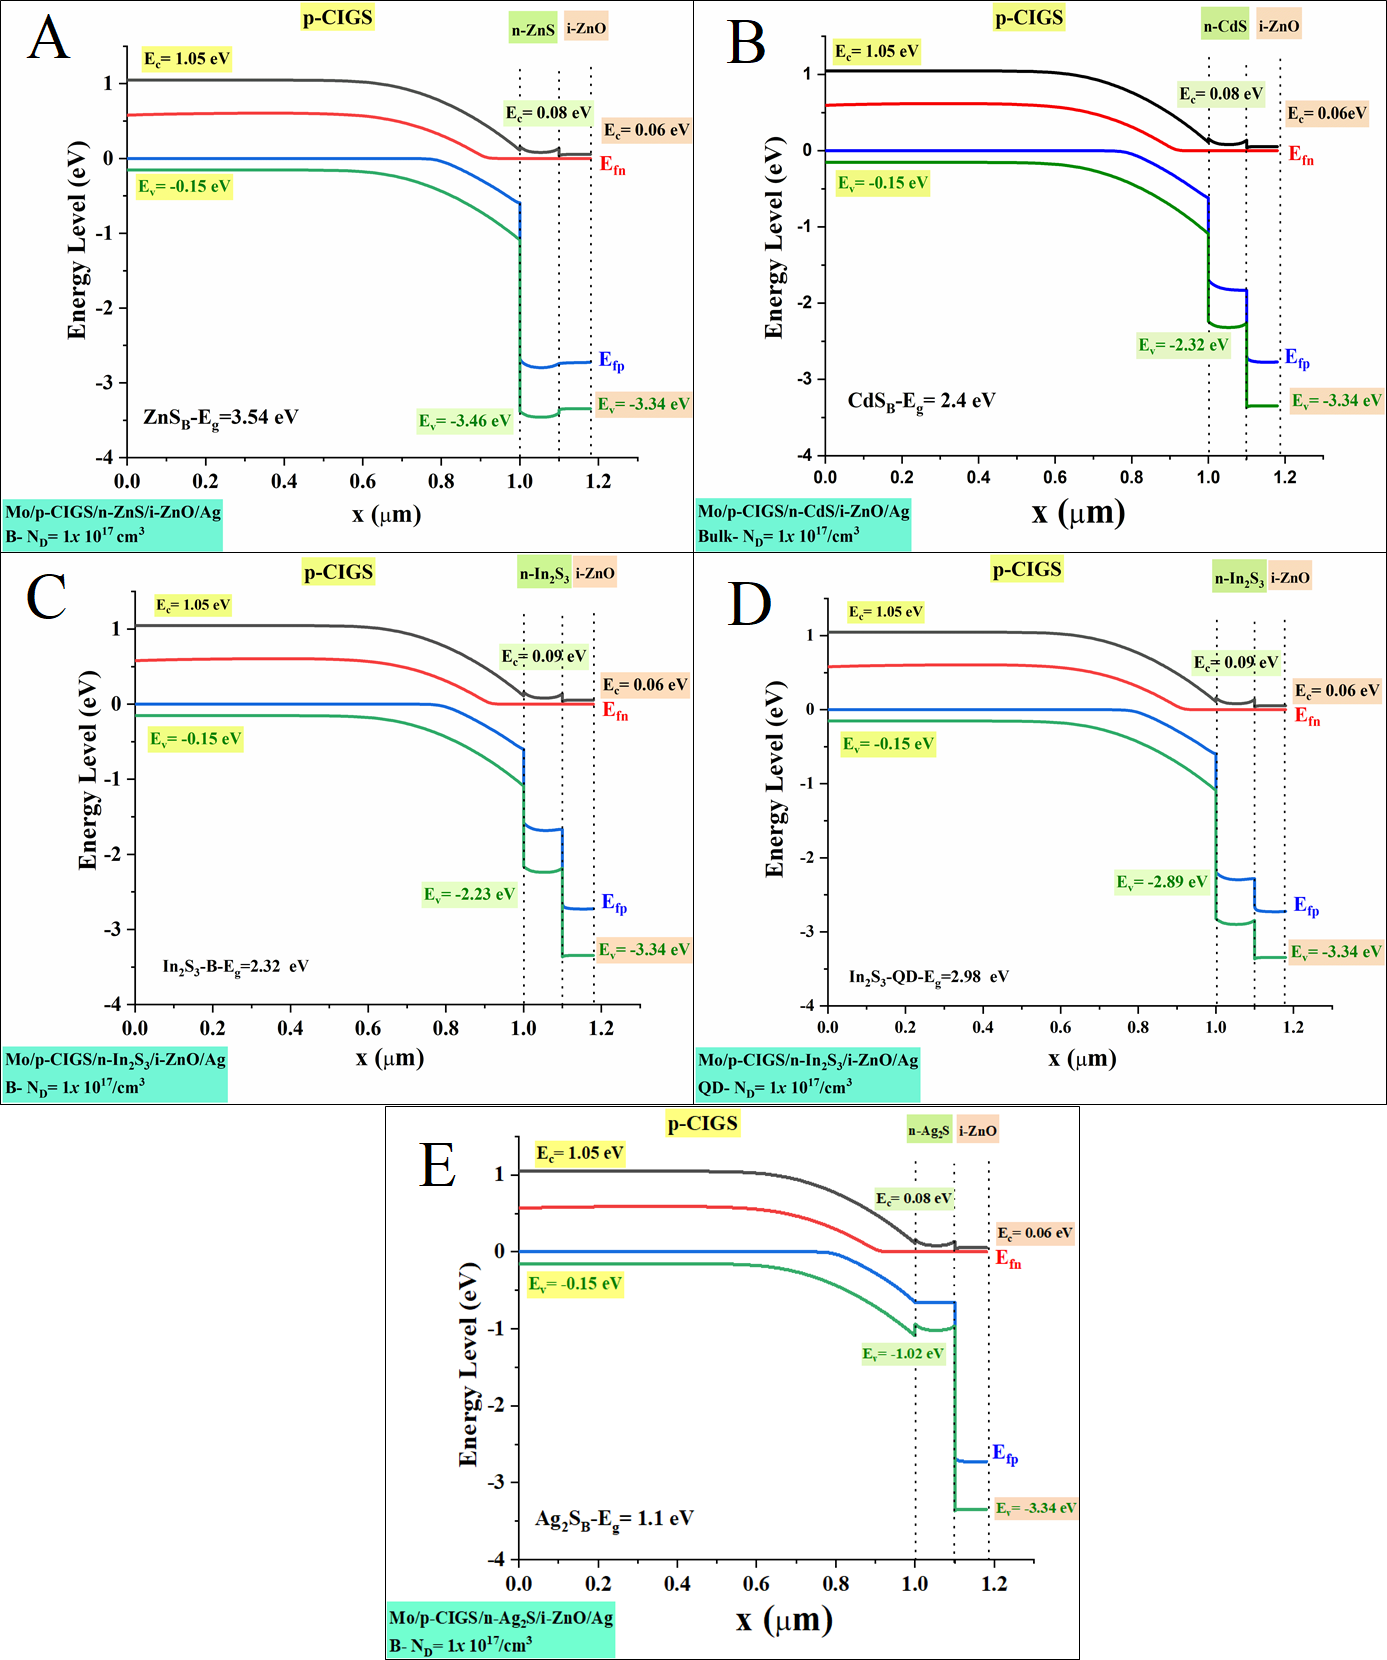


**Fig A1.** Band diagram at Bulk bandgap at ND=1017


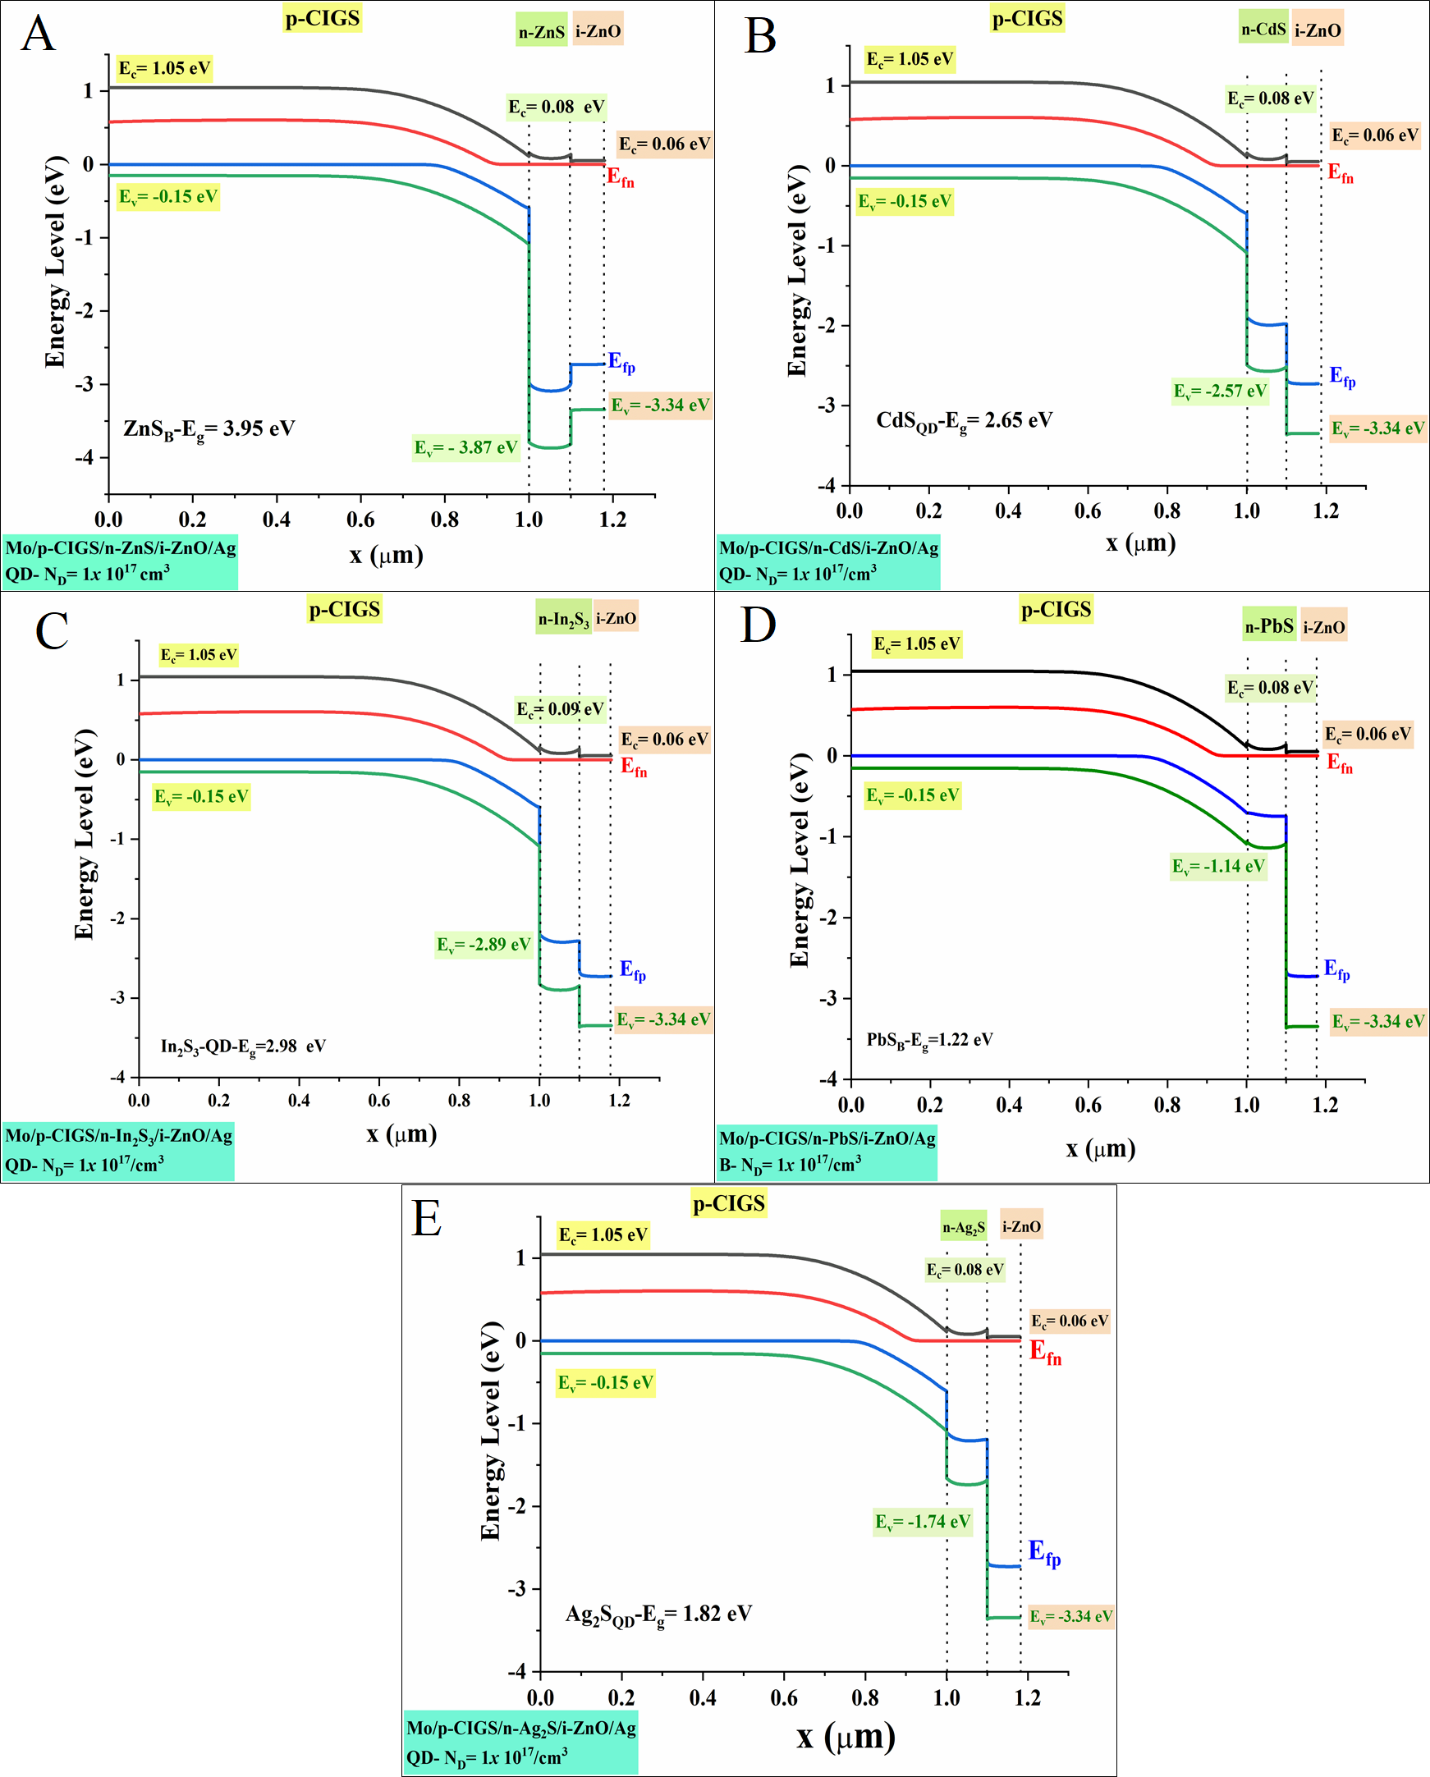


**Fig B1.** Band diagram at Quantum bandgap at ND=1017


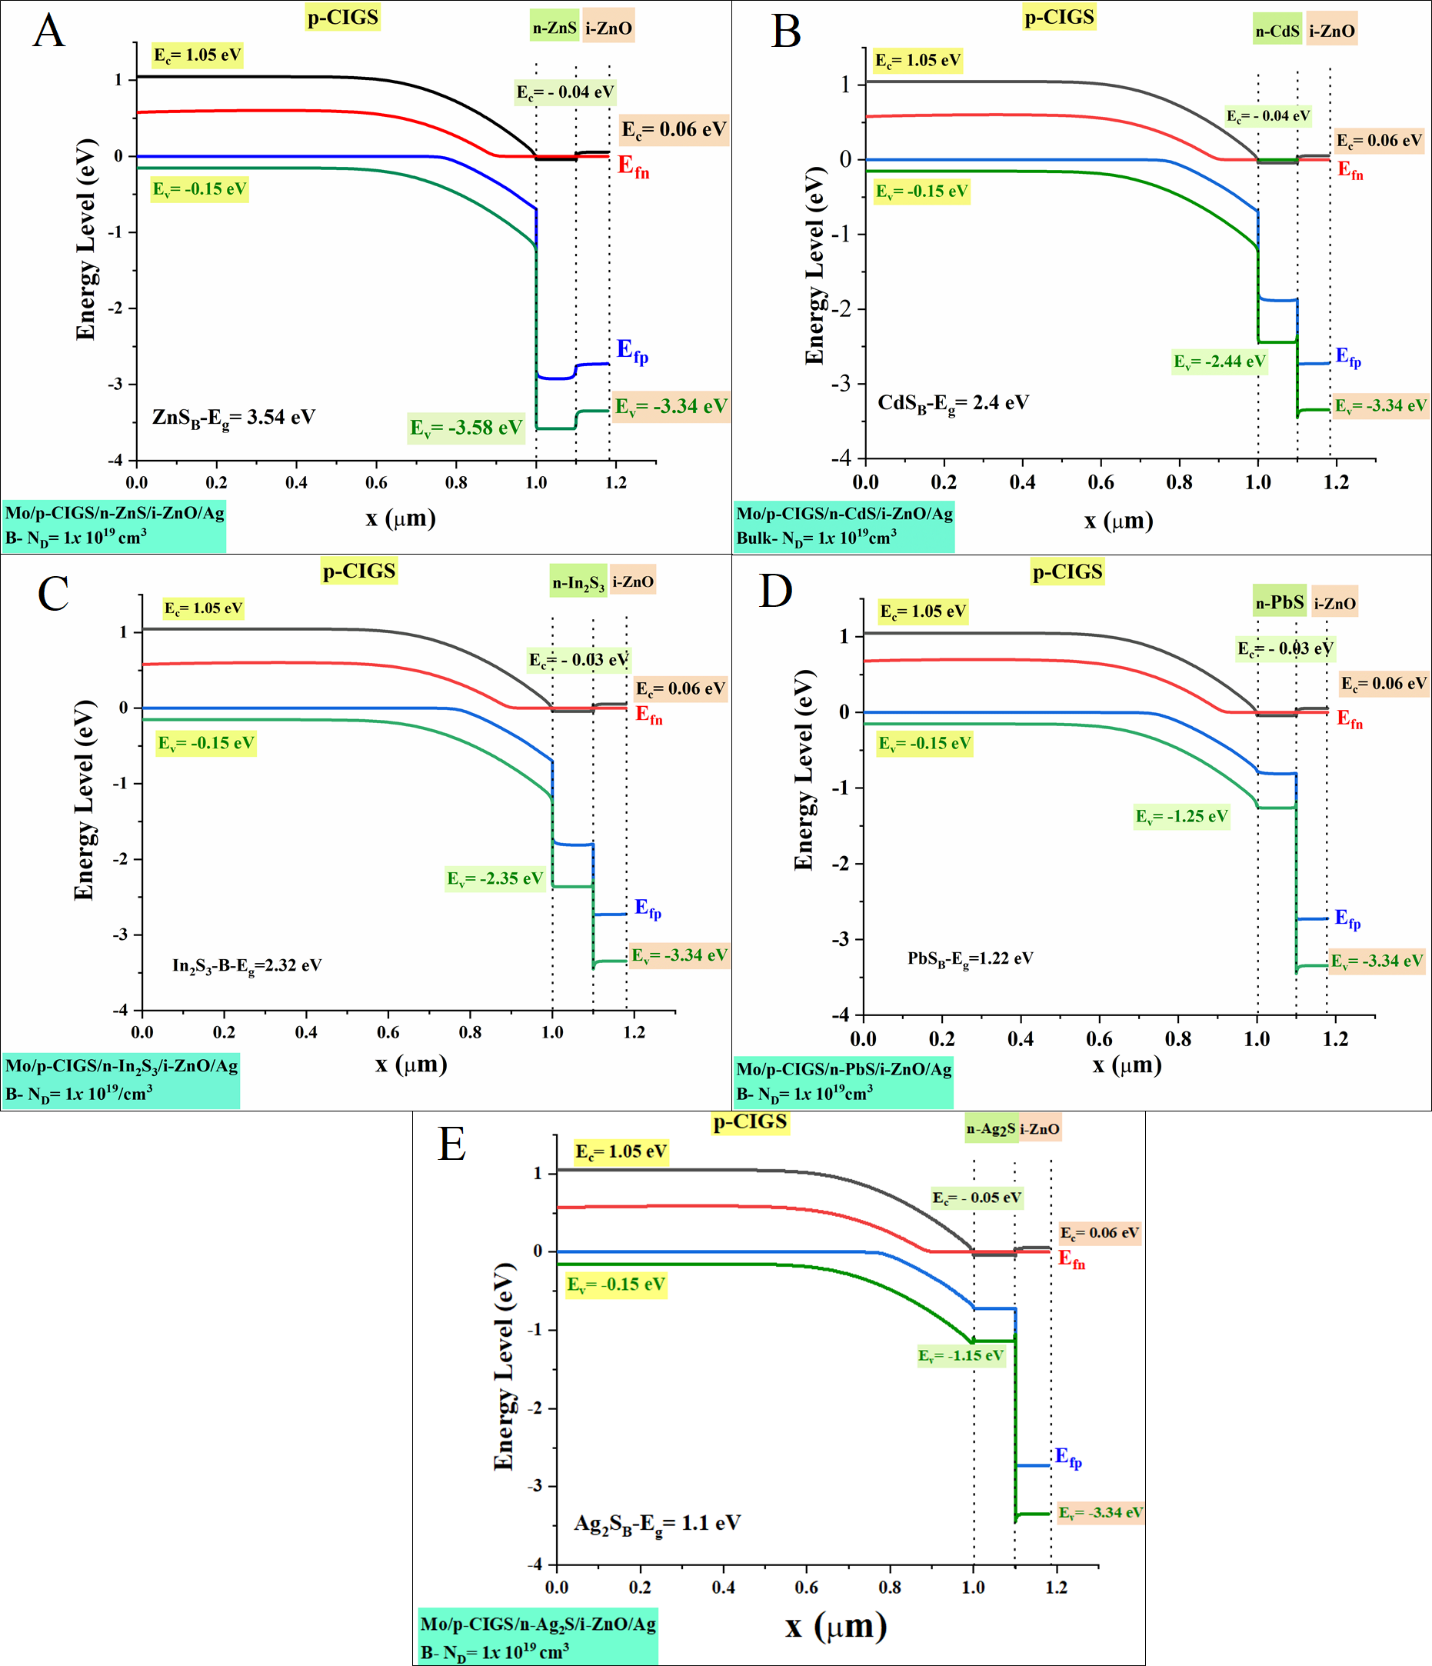


**Fig A2.** Band diagram at Bulk bandgap at ND=1019


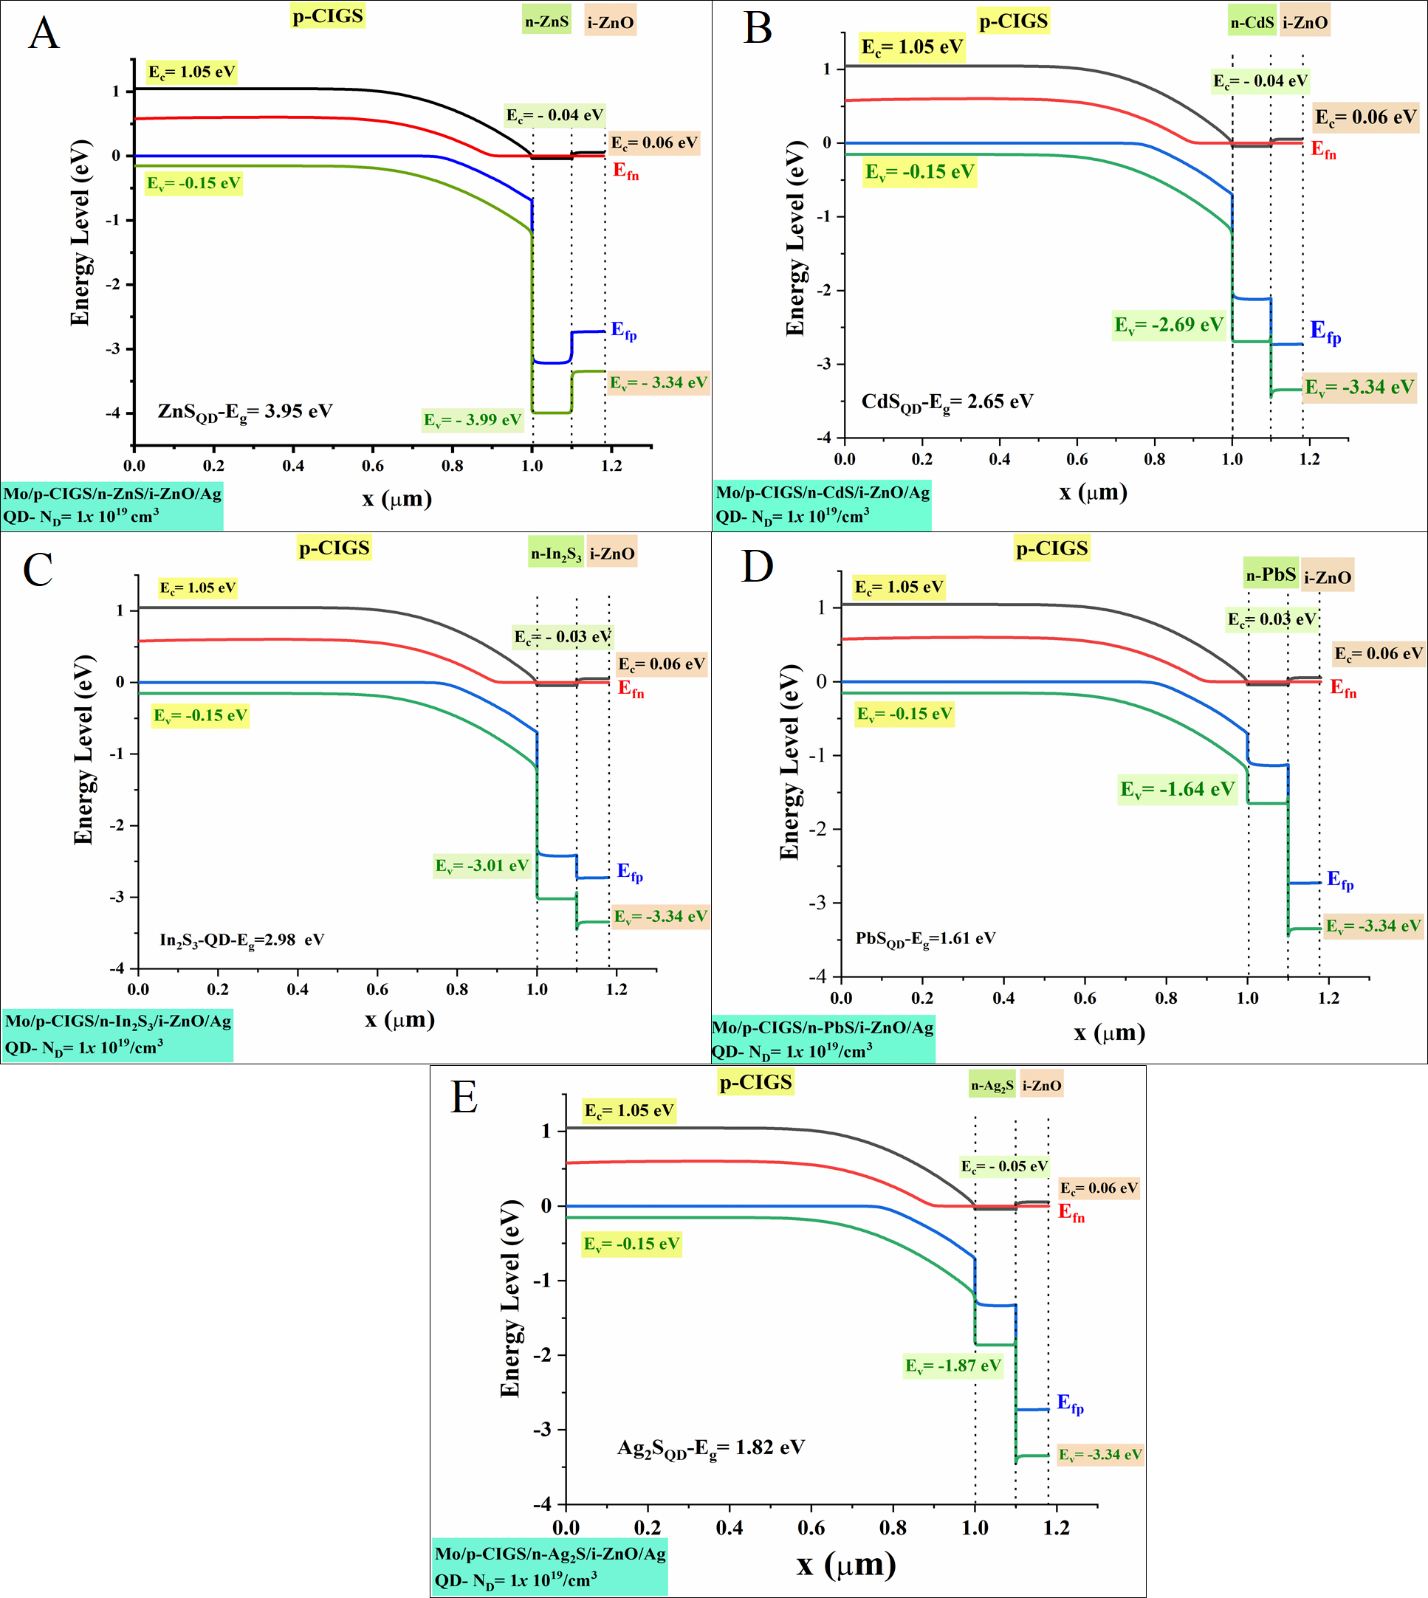


**Fig B2.** Band diagram at Quantum bandgap at ND=1019
